# Supplementary material for: Control of micro/mesoporosity in non-hydrolytic hybrid silicophosphate xerogels
Source: Royal Society of Chemistry journal article supplement (doi:10.1039/c4ta06823h), 2015-01-01
Supplement: c4ta06823h1.pdf [file c4ta06823h1.pdf]

## Supplementary materials

### Control of Micro/Mesoporosity in Non-hydrolytic Hybrid Silicophosphate Xerogels

Ales Styskalik,<sup>a,b</sup> David Skoda,<sup>a,b</sup> Zdenek Moravec,<sup>a</sup> Michal Babiak,<sup>a,b</sup> Craig E. Barnes,<sup>c</sup> and Jiri Pinkas<sup>\*,a,b</sup>

<sup>a</sup> Masaryk University, Department of Chemistry, Kotlarska 2, CZ-61137 Brno, Czech Republic.  
E-mail: [jpinkas@chemi.muni.cz](mailto:jpinkas@chemi.muni.cz)

<sup>b</sup> Masaryk University, CEITEC MU, Kamenice 5, CZ-62500 Brno, Czech Republic.

<sup>c</sup> University of Tennessee, Department of Chemistry, Knoxville, TN 37996-1600, United States.

\*Corresponding author. Phone: +420549496493; fax: +420549492443; E-mail address: [jpinkas@chemi.muni.cz](mailto:jpinkas@chemi.muni.cz) (J. Pinkas)

### Experimental

**Syntheses.** Si(OAc)<sub>4</sub> (OAc = acetate) was prepared according to the literature.<sup>1</sup> MeSi(OAc)<sub>3</sub>, Me<sub>2</sub>Si(OAc)<sub>2</sub>, <sup>t</sup>BuSi(OAc)<sub>3</sub>, and (AcO)<sub>3</sub>Si(CH<sub>2</sub>)<sub>n</sub>Si(OAc)<sub>3</sub>, (n = 1–3, 6) were prepared by a modified procedure – the complete acetylation of the alkyltrichlorosilanes was attained by distilling off CH<sub>3</sub>COCl from the reaction mixture. PhSi(OAc)<sub>3</sub> and Ph<sub>2</sub>Si(OAc)<sub>2</sub> were prepared according to the literature<sup>2,3</sup> and purified by vacuum sublimation. <sup>t</sup>BuOSi(OAc)<sub>3</sub> was prepared according to literature.<sup>4</sup> SiCl<sub>4</sub> (Merck, 99 %) and acetic acid anhydride (Riedel de Haën, 98 %) were distilled prior to use, <sup>t</sup>BuOH was dried over molecular sieve, NaOAc was dried in an oven at 110 °C, MeSiCl<sub>3</sub> (Sigma-Aldrich, 99 %), Me<sub>2</sub>SiCl<sub>2</sub> (Sigma-Aldrich, 99.5 %), <sup>t</sup>BuSiCl<sub>3</sub> (Sigma-Aldrich, 96 %), Cl<sub>3</sub>Si(CH<sub>2</sub>)<sub>n</sub>SiCl<sub>3</sub> (Gelest, Inc.), PhSiCl<sub>3</sub> (Sigma-Aldrich, 97 %) and Ph<sub>2</sub>SiCl<sub>2</sub> (Sigma-Aldrich, 97 %) were used as received. Toluene was freshly distilled from Na/benzophenone under N<sub>2</sub> before use. *Tris*(trimethylsilyl)phosphate (TTP) was prepared from H<sub>3</sub>PO<sub>4</sub> and Me<sub>3</sub>SiCl and vacuum-distilled. PhP(O)(OSiMe<sub>3</sub>)<sub>2</sub> and C<sub>6</sub>H<sub>11</sub>P(O)(OSiMe<sub>3</sub>)<sub>2</sub> were prepared from the corresponding phosphonic acids and Me<sub>3</sub>SiCl.<sup>5</sup>

$(\text{Me}_3\text{SiO})_2\text{P}(\text{O})\text{CH}_2\text{CH}_2\text{P}(\text{O})(\text{OSiMe}_3)_2$  and  $(\text{Me}_3\text{SiO})_2\text{P}(\text{O})\text{C}_6\text{H}_4\text{P}(\text{O})(\text{OSiMe}_3)_2$  were prepared from triethylphosphite by the Arbuzov reaction<sup>6</sup> followed by silylation with  $\text{Me}_3\text{SiBr}$ .<sup>7</sup> Their purification was done by vacuum distillation and vacuum sublimation, respectively.  $\text{PhP}(\text{O})(\text{OH})_2$  (Sigma-Aldrich, 98 %),  $\text{C}_6\text{H}_{11}\text{P}(\text{O})(\text{OH})_2$  (house stock), triethylphosphite (Sigma-Aldrich, 98 %), 1,2-dibromoethane (Sigma-Aldrich, 98 %), 1,4-dibromobenzene (Sigma-Aldrich, 98%) and  $\text{Me}_3\text{SiBr}$  (Sigma-Aldrich, 97 %) were used as received,  $\text{NiCl}_2 \cdot x\text{H}_2\text{O}$  was vacuum dried at 150 °C. Benzene- $d_6$  was dried over and distilled from Na/K alloy and degassed prior to use.  $\text{CDCl}_3$  was dried by  $\text{P}_2\text{O}_5$  and vacuum-transferred to an ampoule.

**Characterization.** The IR spectra ( $4000\text{--}400\text{ cm}^{-1}$ ) were recorded on a Bruker Tensor T27 spectrometer. Samples were prepared as KBr pellets.  $\text{N}_2$  adsorption-desorption experiments were performed at 77 K on a Quantachrome Autosorb-1MP porosimeter.<sup>8,9</sup> Prior to the measurements, the samples were degassed at 25 °C for at least 24 h until the outgas rate was less than  $0.4\text{ Pa min}^{-1}$ . The adsorption-desorption isotherm was measured for each sample at least three times. The specific surface area was determined by the multipoint BET method with at least five data points with relative pressures between 0.05 and 0.23. Micropore volume was established from a t-plot and pore size distribution from DFT procedure with Kernel N2 at 77 K on silica, cylindrical pore, NSDFT equilibrium model. Thermal analysis (TG/DSC) was measured on a Netzsch STA 449C Jupiter apparatus from 25–1000 °C under flowing air ( $70\text{ cm}^3\text{ min}^{-1}$ ) with a heating rate of  $5\text{ K min}^{-1}$ . Solution NMR spectra were recorded on a Bruker Avance II 300 NMR spectrometer at frequencies of 300.1 MHz for  $^1\text{H}$  and 75.5 MHz for  $^{13}\text{C}$  with deuterated solvents as the external lock. The  $^1\text{H}$  and  $^{13}\text{C}\{^1\text{H}\}$  NMR spectra were referenced to the residual proton signals or carbon resonances of benzene- $d_6$  (7.15 and 128.0 ppm, respectively) and  $\text{CDCl}_3$  (7.20 and 77.0 ppm). Solid-state  $^{31}\text{P}$  MAS,  $^{29}\text{Si}$  CPMAS, and  $^{13}\text{C}$  CPMAS NMR spectra were acquired on a wide-bore Varian INOVA 400 NMR spectrometer with a broadband Chemagnetic 5mm MAS probe. Inside a dry box, samples were loaded into 5 mm pencil rotors, stoppered with teflon plugs and sealed with silicon grease and paraffin wax. Magic angle spinning rates were 5 kHz for  $^{29}\text{Si}$  and  $^{13}\text{C}$  CPMAS and 10 kHz for  $^{31}\text{P}$  MAS spectra. Chemical shifts were referenced externally to  $^{31}\text{P}$   $\delta$  [ $\text{H}_3\text{PO}_4$  (85%)]: 0.0 ppm;  $^{29}\text{Si}$   $\delta$  [ $(\text{Me}_3\text{SiO})_8\text{Si}_8\text{O}_{20}$ ]: 11.72 ppm;  $^{13}\text{C}$   $\delta$  [adamantane] 38.68 ppm. GC-MS spectra were obtained on a Thermo Scientific Trace GC Ultra – TSQ Quantum XLS mass spectrometer. TS-SQC column (15 m, 0.25 mm, 0.25  $\mu\text{m}$ ) was heated with following program: 50 °C (0 min),  $5\text{ °C min}^{-1}$  up to 80 °C,  $15\text{ °C min}^{-1}$  up to 120 °C,  $35\text{ °C min}^{-1}$  up to 200 °C (0.5 min). Split mode, injector temperature 200 °C, interface temperature 200 °C, detector temperature 200 °C. Column pressure was set to 31.5 kPa and ionization energy to 70 eV. Single-crystal X-ray diffraction data were collected on a KUMA KM-4  $\kappa$ -axis CCD diffractometer

with Mo-K $\alpha$  radiation ( $\lambda = 0.71073 \text{ \AA}$ ). The temperature during data collection was 120(2) K. The structure of  $[(\text{Ph}_2\text{Si}\{\text{O}_2\text{P}(\text{O})\text{OSiMe}_3\})_2]$  was solved by direct methods and refined by standard methods using ShelXTL software package.<sup>10,11</sup>

The site occupancy factors of atoms of solvent molecule (disordered near the center of inversion) were set to 0.5 and the rigid bond restrain (RIGU) was applied to whole solvent molecule. Additionally, the geometry of the solvent molecule was restrained by SAME instruction. All hydrogen atoms were placed at calculated positions and were refined as riding with their  $U_{\text{iso}}$  set to either  $1.2U_{\text{eq}}$  or  $1.5U_{\text{eq}}$  (methyl) of the respective carrier atoms. Hydrogens of methyl groups were allowed to rotate about the C—CH<sub>3</sub> bond. Details of the data collection and structure refinement are listed in Tab. 1S. CCDC xxxyyy contains the supplementary crystallographic data for this paper. These data can be obtained free of charge from The Cambridge Crystallographic Data Centre via [www.ccdc.cam.ac.uk/data\\_request/cif](http://www.ccdc.cam.ac.uk/data_request/cif).

#### 1. Mono- and dialkyl/arylacetoxyasilanes and alkyl/arylphosphonic acid esters

**MeSiP.**  $\text{OP}(\text{OSiMe}_3)_3$  (1.450 g; 4.615 mmol) was added dropwise to a stirred solution of  $\text{MeSi}(\text{OAc})_3$  (1.025 g; 4.655 mmol) in toluene (5 cm<sup>3</sup>). After the addition was complete, stirring was stopped and the reaction mixture was kept at 80 °C for one week. The resulting viscous liquid afforded glue-like mixture of oligomers after drying *in vacuo* at room temperature. Further drying at 100 °C provided 0.8722 g of hard glassy product (**MeSiP**) (Tab. 1S).

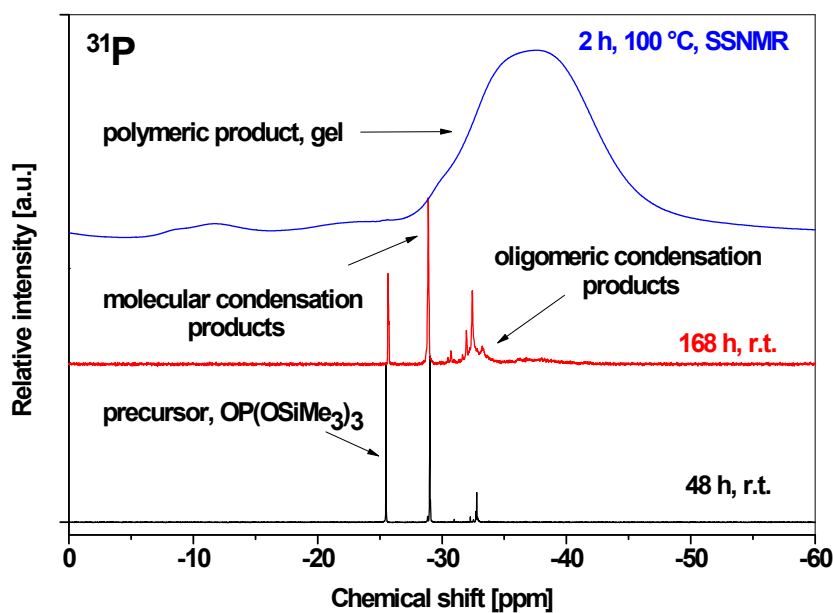

Fig. 1S: The extent of condensation between  $\text{MeSi}(\text{OAc})_3$  and  $\text{OP}(\text{OSiMe}_3)_3$  followed by <sup>31</sup>P NMR.

IR (**MeSiP**, KBr,  $\text{cm}^{-1}$ )  $\nu$ :  $\nu$  500 m, 606 w, 730 m ( $\rho_s$  SiCH<sub>3</sub>), 765 vw ( $\rho_s$  SiCH<sub>3</sub>), 807 s ( $\rho_{as}$  SiCH<sub>3</sub>), 850 s ( $\rho_{as}$  SiCH<sub>3</sub>), 1019 vs ( $\nu$  Si–O–P), 1227 vw, 1260 m ( $\delta_s$  SiCH<sub>3</sub>), 1281 m ( $\delta_s$  SiCH<sub>3</sub>), 1319 m ( $\nu$  P=O), 1377 vw ( $\delta_s$  CH<sub>3</sub>), 1720 w, 1753 m ( $\nu_{as}$  CH<sub>3</sub>COO unident), 2920 vw ( $\nu_s$  CH<sub>3</sub>), 2968 w ( $\nu_{as}$  CH<sub>3</sub>).

<sup>13</sup>C CPMAS NMR (**MeSiP**, ppm)  $\delta$ : –4.1 (POSiCH<sub>3</sub>), 1.1 (O<sub>3</sub>SiCH<sub>3</sub>), 22.7 (CH<sub>3</sub>COO unident), 169.7 (CH<sub>3</sub>COO unident).

<sup>29</sup>Si CPMAS NMR (**MeSiP**, ppm)  $\delta$ : 26 (POSiMe<sub>3</sub>), –61 (MeSiO<sub>3</sub>).

<sup>31</sup>P MAS NMR (**MeSiP**, ppm)  $\delta$ : –37 (O=P(OSi)<sub>3</sub>).

**SiHexP**. C<sub>6</sub>H<sub>11</sub>P(O)(OSiMe<sub>3</sub>)<sub>2</sub> (1.327 g; 4.305 mmol) was added dropwise to a stirred melt of Si(OAc)<sub>4</sub> (0.572 g; 2.16 mmol) at 125 °C. The reaction was stopped after 30 min and drying *in vacuo* afforded 0.747 g of orange xerogel (**SiHexP**). The reaction was carried out also in toluene at 80 °C providing an orange xerogel. Both products showed identical properties.

IR (**SiHexP**, KBr,  $\text{cm}^{-1}$ )  $\nu$ : 451 m, 561 m, 649 w ( $\nu$  SiC<sub>3</sub>), 762 w ( $\rho_s$  SiCH<sub>3</sub>), 851 s ( $\rho_{as}$  SiCH<sub>3</sub>), 894 w, 1021 vs ( $\rho$  CH<sub>3</sub>), 1093 vs ( $\nu$  Si–O–P), 1127 vs ( $\nu$  P–O–Si), 1221 s, 1256 s ( $\delta_s$  SiCH<sub>3</sub>), 1283 m, 1300 sh ( $\nu$  P=O), 1372 vw, 1452 m, 1541 w ( $\nu_{as}$  CH<sub>3</sub>COO bident), 1720 w ( $\nu_{as}$  CH<sub>3</sub>COO unident), 1761 w ( $\nu_{as}$  CH<sub>3</sub>COO unident), 2856 s ( $\nu_s$  CH<sub>2</sub>), 2933 vs ( $\nu_{as}$  CH<sub>2</sub>).

<sup>13</sup>C CPMAS NMR (**SiHexP**, ppm)  $\delta$ : –1.2 (POSiCH<sub>3</sub>), 26.6 (C<sub>6</sub>H<sub>11</sub>), 37.2 (C<sub>6</sub>H<sub>11</sub>), 167.9 (CH<sub>3</sub>COO unident), 192.1 (CH<sub>3</sub>COO bident).

<sup>29</sup>Si MAS NMR (**SiHexP**, ppm)  $\delta$ : 22 (POSiMe<sub>3</sub>), –111 (SiO<sub>4</sub>), –195 (SiO<sub>6</sub>), –214 (SiO<sub>6</sub>).

<sup>31</sup>P MAS NMR (**SiHexP**, ppm)  $\delta$ : 10 (C<sub>6</sub>H<sub>11</sub>P(O)(OSi)<sub>2</sub>), 3 (C<sub>6</sub>H<sub>11</sub>P(OSi)<sub>3</sub>).

**Tab. 1S: Mono- and dialkyl/arylacetoxy silanes and alkyl/arylphosphonic acid esters: Reagent molar amounts, yields, degrees of condensation (DC) and comparison of experimental (ML) and calculated mass losses (ML<sub>calc</sub>) during thermogravimetric analysis of hybrid silicophosphates.**

| Sample | n <sub>Si</sub> [mmol] | n <sub>P</sub> [mmol] | Yield [g] | DC [%] | ML [%] | ML <sub>calc</sub> [%] |
|--------|------------------------|-----------------------|-----------|--------|--------|------------------------|
| SiP    | 11.93                  | 15.84                 | 2.733     | 85.7   | 29.4   | 32.8                   |
| MeSiP  | 4.655                  | 4.615                 | 0.872     | 87.1   | 32.1   | 35.3                   |
| Me2SiP | 4.20                   | 2.80                  | 0.579     | 89.4   | -      | -                      |
| PhSiP  | 3.621                  | 3.636                 | 1.296     | 63.6   | -      | -                      |
| Ph2SiP | 3.30                   | 2.38                  | 1.144     | 61.9   | -      | -                      |
| BuSiP  | 2.18                   | 2.40                  | 0.659     | 69.3   | -      | -                      |
| SiHexP | 2.16                   | 4.305                 | 0.747     | 100    | 65.0   | 42.8                   |
| SiPhP  | 4.597                  | 9.318                 | 2.582     | 58.1   | 63.5   | 64.1                   |

Tab. 2S: Gelation properties of various alkyl/arylacetoxy silanes and alkyl/arylphosphonates.

| Sample              | Si precursor                         | P precursor                                                           | Sol <sup>a</sup> | Gel | Product <sup>b</sup> | SA [m <sup>2</sup> g <sup>-1</sup> ] |
|---------------------|--------------------------------------|-----------------------------------------------------------------------|------------------|-----|----------------------|--------------------------------------|
| SiP                 | Si(OAc) <sub>4</sub>                 | OP(OSiMe <sub>3</sub> ) <sub>3</sub>                                  | Yes              | Yes | X                    | 568                                  |
| MeSiP               | MeSi(OAc) <sub>3</sub>               | OP(OSiMe <sub>3</sub> ) <sub>3</sub>                                  | Yes              | Yes | X                    | Nonporous                            |
| Me <sub>2</sub> SiP | Me <sub>2</sub> Si(OAc) <sub>2</sub> | OP(OSiMe <sub>3</sub> ) <sub>3</sub>                                  | Yes              | No  | O                    | -                                    |
| PhSiP               | PhSi(OAc) <sub>3</sub>               | OP(OSiMe <sub>3</sub> ) <sub>3</sub>                                  | Yes              | No  | O                    | -                                    |
| Ph <sub>2</sub> SiP | Ph <sub>2</sub> Si(OAc) <sub>2</sub> | OP(OSiMe <sub>3</sub> ) <sub>3</sub>                                  | No               | No  | M                    | -                                    |
| BuSiP               | <sup>t</sup> BuSi(OAc) <sub>3</sub>  | OP(OSiMe <sub>3</sub> ) <sub>3</sub>                                  | Yes              | No  | O                    | -                                    |
| SiHexP              | Si(OAc) <sub>4</sub>                 | C <sub>6</sub> H <sub>11</sub> P(O)(OSiMe <sub>3</sub> ) <sub>2</sub> | Yes              | Yes | X                    | Nonporous                            |
| SiPhP               | Si(OAc) <sub>4</sub>                 | PhP(O)(OSiMe <sub>3</sub> ) <sub>2</sub>                              | Yes              | Yes | P                    | Nonporous                            |

<sup>a</sup> Results of NMR reactions. <sup>b</sup> X = xerogel, P = precipitate, O = mixture of oligomers, M = molecular products. Nonporous = SA below 10 m<sup>2</sup> g<sup>-1</sup>

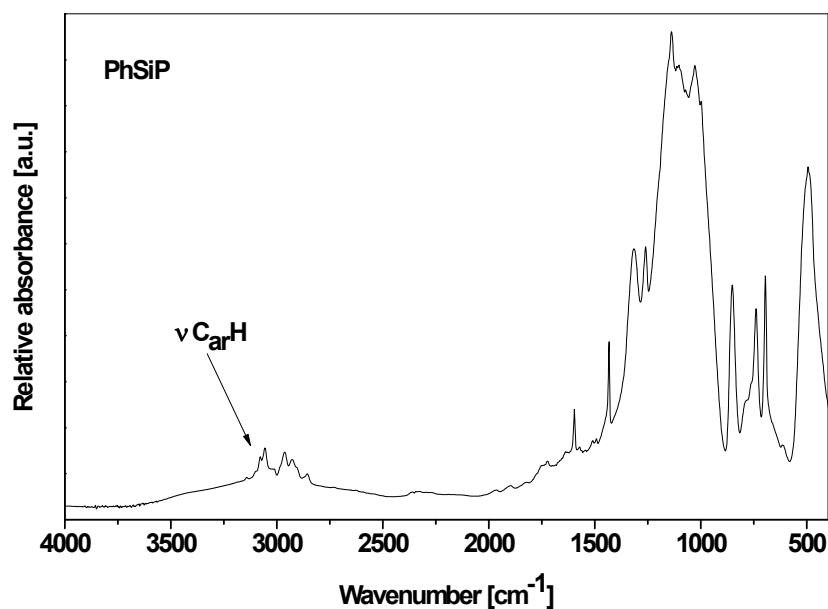

Fig. 2S: IR spectrum of hybrid silicophosphate xerogel with Ph-SiO<sub>3</sub> groups (PhSiP).

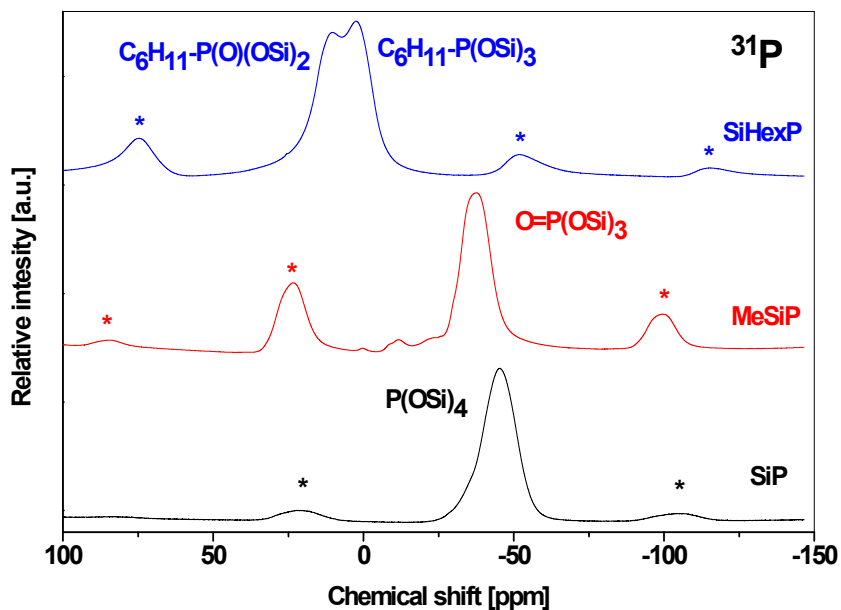

Fig. 3S:  $^{31}\text{P}$  MAS NMR spectra of hybrid silicophosphate xerogel with  $\text{C}_6\text{H}_{11}\text{-P(O)}_2$  groups (**SiHexP**, top), hybrid xerogel with  $\text{CH}_3\text{-SiO}_3$  groups (**MeSiP**, center) and parent silicophosphate sample (**SiP**, bottom). Asterisks denote spinning sidebands.

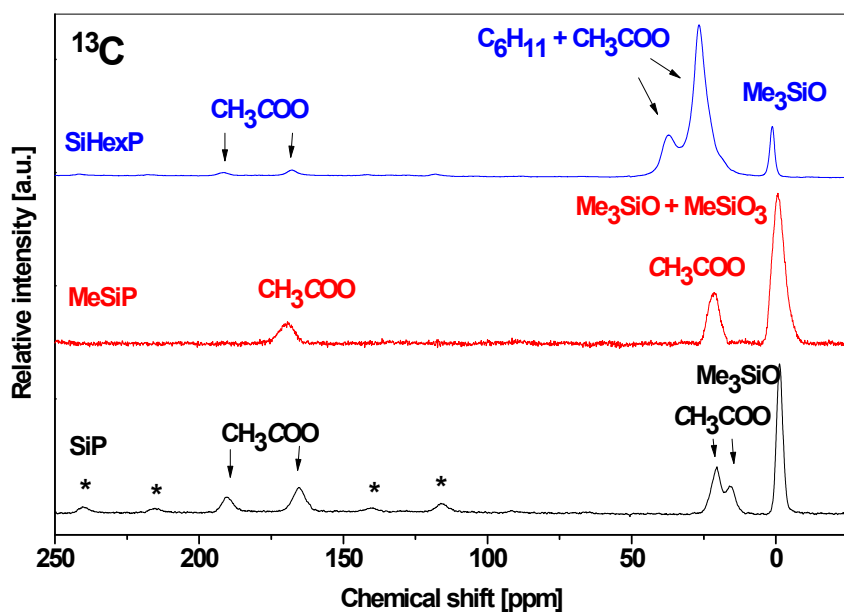

Fig. 4S:  $^{13}\text{C}$  CPMAS NMR spectra of hybrid silicophosphate xerogel with  $\text{C}_6\text{H}_{11}\text{-P(O)}_2$  groups (**SiHexP**, top), hybrid xerogel with  $\text{CH}_3\text{-SiO}_3$  groups (**MeSiP**, center) and parent silicophosphate sample (**SiP**, bottom). Asterisks denote spinning sidebands.

**BuOSiP.** OP(OSiMe<sub>3</sub>)<sub>3</sub> (0.798 g; 2.54 mmol) was added dropwise to a stirred solution of <sup>t</sup>BuOSi(OAc)<sub>3</sub> (0.711 g; 2.55 mmol) in toluene (8 cm<sup>3</sup>). After the addition was complete, stirring was stopped. The reaction mixture was kept at 80 °C for 48 h during which time the viscosity of the mixture increased, however the gel was not formed. The reaction mixture was then dried under vacuum for two days and 0.410 g of a white powder (**BuOSiP**) was obtained.

IR (**BuOSiP**, KBr, cm<sup>-1</sup>)  $\nu$ : 514 m, 763 w ( $\rho_s$  SiCH<sub>3</sub>), 856 s ( $\rho_{as}$  SiCH<sub>3</sub>), 894 w, 1102 vs ( $\nu$  Si–O–P), 1259 s ( $\delta_s$  SiCH<sub>3</sub>), 1305 sh ( $\nu$  P=O), 1373 w, 1397 vw, 1475 w, 1705 w ( $\nu_{as}$  COO unident), 1758 w ( $\nu_{as}$  COO unident), 2906 s ( $\nu_s$  CH<sub>3</sub>), 2980 vs ( $\nu_{as}$  CH<sub>3</sub>).

<sup>13</sup>C CP/MAS NMR (**BuOSiP**, ppm)  $\delta$ : 0.2 (POSiCH<sub>3</sub>), 30.5 ((CH<sub>3</sub>)<sub>3</sub>CO), 75.5 ((CH<sub>3</sub>)<sub>3</sub>CO).

<sup>29</sup>Si MAS NMR (**BuOSiP**, ppm)  $\delta$ : 23 (POSiMe<sub>3</sub>), 14 (POSiMe<sub>3</sub>), –114 (SiO<sub>4</sub>), –215 (SiO<sub>6</sub>).

**[(Ph<sub>2</sub>Si{O<sub>2</sub>P(O)OSiMe<sub>3</sub>})<sub>2</sub>].** A solution of diphenyldiacetoxysilane (0.292 g; 0.972 mmol) in toluene (10 cm<sup>3</sup>) was dropwise added to the solution of TTP (0.307 g; 0.977 mmol) in toluene (10 cm<sup>3</sup>). The reaction mixture was placed into the oil bath and kept at 80 °C for one week. According to <sup>31</sup>P NMR, the starting ester was completely consumed and the reaction mixture consisted of at least four molecular condensation products. The toluene was removed *in vacuo* and the resulting mixture was recrystallized from 10 cm<sup>3</sup> of hexane and 2 cm<sup>3</sup> of THF affording small amount of colorless hexagonal crystals (20 mg, 6 %).

<sup>1</sup>H NMR ([[(Ph<sub>2</sub>Si{O<sub>2</sub>P(O)OSiMe<sub>3</sub>})<sub>2</sub>], ppm)  $\delta$ : 0.09 (s, (CH<sub>3</sub>)<sub>3</sub>Si), 1.29 (s, CH<sub>3</sub>C<sub>6</sub>H<sub>5</sub>), 6.9–7.7 (mult., (C<sub>6</sub>H<sub>4</sub>)<sub>2</sub>Si).

<sup>31</sup>P NMR ([[(Ph<sub>2</sub>Si{O<sub>2</sub>P(O)OSiMe<sub>3</sub>})<sub>2</sub>], ppm)  $\delta$ : –32.6 (s, O<sub>2</sub>P(O)OSiMe<sub>3</sub>).

[(Ph<sub>2</sub>Si{O<sub>2</sub>P(O)OSiMe<sub>3</sub>})<sub>2</sub>] and [(<sup>t</sup>Bu<sub>2</sub>Si{O<sub>2</sub>P(O)Ph})<sub>2</sub>]<sup>12</sup> are the only structurally characterized examples of Si<sub>2</sub>P<sub>2</sub>O<sub>4</sub> cycles. They resemble the single four-ring (S4R) building units of zeolites. There is a structural difference between these two molecules. In the case of [(Ph<sub>2</sub>Si{O<sub>2</sub>P(O)OSiMe<sub>3</sub>})<sub>2</sub>], the trans trimethylsilyloxy groups on phosphorus atoms point axially with respect to the central Si<sub>2</sub>O<sub>4</sub> plane and the terminal P=O groups are directed equatorially. In the case of [(<sup>t</sup>Bu<sub>2</sub>Si{O<sub>2</sub>P(O)Ph})<sub>2</sub>], the terminal P=O oxygen atoms are in an axial position and phenyl groups are situated in equatorial positions. This is probably due to steric differences between trimethylsilyloxy and phenyl groups.<sup>12</sup> The formation of ring- and cage-containing oligomers is known to prevent gelation to highly cross-linked networks in organotrialkoxysilanes.

**Tab. 3S: Crystal data and structure refinement parameters.**

| compound                                                      | $[(\text{Ph}_2\text{Si}\{\text{O}_2\text{P}(\text{O})\text{OSiMe}_3\})_2]$ |
|---------------------------------------------------------------|----------------------------------------------------------------------------|
| empirical formula                                             | $\text{C}_{37} \text{H}_{48} \text{O}_8 \text{P}_2 \text{Si}_4$            |
| fw                                                            | 795.05                                                                     |
| crystal system                                                | Monoclinic                                                                 |
| space group                                                   | $P 2_1/n$                                                                  |
| temperature, K                                                | 120(2)                                                                     |
| $\lambda$ , Å                                                 | 0.71073                                                                    |
| $a$ , Å                                                       | 10.2590(3)                                                                 |
| $b$ , Å                                                       | 11.6835(3)                                                                 |
| $c$ , Å                                                       | 16.8330(4)                                                                 |
| $\alpha$ , deg                                                | 90                                                                         |
| $\beta$ , deg                                                 | 92.200(2)                                                                  |
| $\gamma$ , deg                                                | 90                                                                         |
| $V$ , Å <sup>3</sup>                                          | 2016.13(9)                                                                 |
| $Z$                                                           | 2                                                                          |
| $\mu$ , mm <sup>-1</sup>                                      | 0.275                                                                      |
| no. of reflns collected                                       | 7506                                                                       |
| no. of indep. reflns ( $R_{\text{int}}$ )                     | 3682 (0.0121)                                                              |
| no. of data / restraints / parameters                         | 3682 / 51 / 266                                                            |
| GoF on $F^2$                                                  | 1.112                                                                      |
| $R_1$ , <sup>a</sup> $wR_2$ <sup>b</sup> ( $I > 2\sigma(I)$ ) | 0.0306, 0.0882                                                             |
| $R_1$ , <sup>a</sup> $wR_2$ <sup>b</sup> (all data)           | 0.0383, 0.0906                                                             |
| largest diff. peak / hole, e <sup>-</sup> Å <sup>-3</sup>     | 0.373 and -0.320                                                           |

<sup>a</sup>  $R_1 = \frac{\sum ||F_o| - |F_c||}{\sum |F_o|}$ . <sup>b</sup>  $wR_2 = [\frac{\sum w (F_o^2 - F_c^2)^2}{\sum (F_o^2)^2}]^{1/2}$ .



**Tab. 4S: Selected bond distances and bond angles for  $[(\text{Ph}_2\text{Si}\{\text{O}_2\text{P}(\text{O})\text{OSiMe}_3\})_2]$**

|                   |  |
|-------------------|--|
| P(1)=O(4)         |  |
| P(1)-O(2)         |  |
| P(1)-O(1)         |  |
| P(1)-O(3)         |  |
| Si(1)-O(3)#1      |  |
| Si(1)-O(1)        |  |
| Si(1)-C(1)        |  |
| Si(1)-C(7)        |  |
| O(1)-P(1)-O(3)    |  |
| O(3)#1-Si(1)-O(1) |  |
| P(1)-O(1)-Si(1)   |  |
| P(1)-O(3)-Si(1)#1 |  |

## 2. Co-condensation of $\text{Si}(\text{OAc})_4$ and $\text{OP}(\text{OSiMe}_3)_3$ partially substituted with $\text{R}_n\text{Si}(\text{OAc})_{4-n}$ ( $n = 1, 2$ ; $\text{R} = \text{Me, Ph}$ ) and $\text{PhP}(\text{O})(\text{OSiMe}_3)_2$

As an example, syntheses and characterizations of samples based on **SiP** xerogel ( $\text{Si}(\text{OAc})_4 + \text{TTP}$ ) with 10.37 % of  $\text{Si}(\text{OAc})_4$  substituted by  $\text{Me}_2\text{Si}(\text{OAc})_2$  (**SiP-Me2SiP2**) and with 12.63 % TTP substituted by  $\text{PhP}(\text{O})(\text{OSiMe}_3)_2$  (**SiP-PhP1**) are described below. Pertinent data for other samples are listed in Tab. 4S.

**SiP-Me2SiP2.**  $\text{OP}(\text{OSiMe}_3)_3$  (0.8843 g; 2.814 mmol) was added dropwise to a stirred solution of  $\text{Si}(\text{OAc})_4$  (0.5284 g, 1.999 mmol) and  $\text{Me}_2\text{Si}(\text{OAc})_2$  (0.0392 g; 0.222 mmol) in toluene (9  $\text{cm}^3$ ). After the addition was complete, stirring was stopped and the reaction mixture was kept at 80 °C for one week. The gel formed in the reaction mixture within few hours. The gel was then dried under vacuum for two days and 0.6383 g of a white xerogel (**SiP-Me2SiP2**) was obtained.

IR (**SiP-Me2SiP2**, KBr,  $\text{cm}^{-1}$ )  $\nu$  :  $\nu$  591 m, 652 w ( $\nu$   $\text{SiC}_3$ ), 764 w ( $\rho_s$   $\text{SiCH}_3$ ), 853 s ( $\rho_{as}$   $\text{SiCH}_3$ ), 1023 vs ( $\rho$   $\text{CH}_3$ ), 1050 vs ( $\nu$   $\text{Si-O-P}$ ), 1121 vs ( $\nu$   $\text{P-O-Si}$ ), 1259 vs ( $\delta_s$   $\text{SiCH}_3$ ), 1303 sh ( $\nu$   $\text{P=O}$ ), 1373 w ( $\delta_s$   $\text{CH}_3$ ), 1418 vw ( $\delta_{as}$   $\text{CH}_3$ ), 1543 w ( $\nu_{as}$   $\text{COO}$  bident), 1718 vw ( $\nu_{as}$   $\text{CH}_3\text{COO}$  unident), 1768 m ( $\nu_{as}$   $\text{CH}_3\text{COO}$  unident), 2907 vw ( $\nu_s$   $\text{CH}_3$ ), 2964 w ( $\nu_{as}$   $\text{CH}_3$ ).

$^{13}\text{C}$  CPMAS NMR (**SiP-Me2SiP2**, ppm)  $\delta$  : 0.5 ( $\text{SiCH}_3$ ), 16.6 ( $\text{CH}_3\text{COO}$  bident), 22.9 ( $\text{CH}_3\text{COO}$  unident), 167.8 ( $\text{CH}_3\text{COO}$  unident), 191.7 ( $\text{CH}_3\text{COO}$  bident).

$^{29}\text{Si}$  MAS NMR (**SiP-Me2SiP2**, ppm)  $\delta$  : 25 ( $\text{POSiMe}_3$ ), -5 ( $\text{Me}_2\text{SiO}_2$ ), -115 ( $\text{SiO}_4$ ), -195 ( $\text{SiO}_6$ ), -214 ( $\text{SiO}_6$ ).

$^{31}\text{P}$  MAS NMR (**SiP-Me2SiP2**, ppm)  $\delta$  : -30 sh ( $\text{O=P}(\text{OSi})_3$ ), -43 ( $\text{P}(\text{OSi})_4$ ).

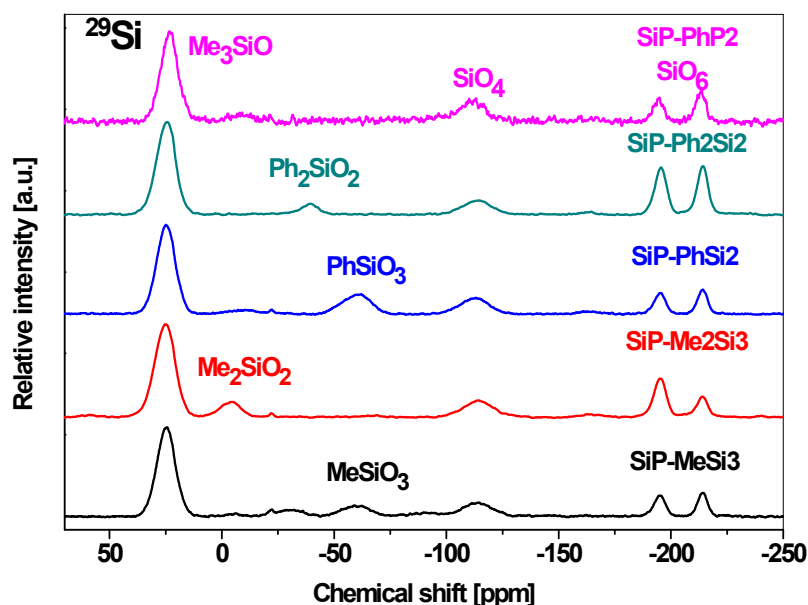

Fig. 5S:  $^{29}\text{Si}$  CPMAS NMR spectra of samples with partially substituted silicon acetate with alkyl- and arylacetoxysilanes and  $\text{PhP}(\text{O})(\text{OSiMe}_3)_2$ .

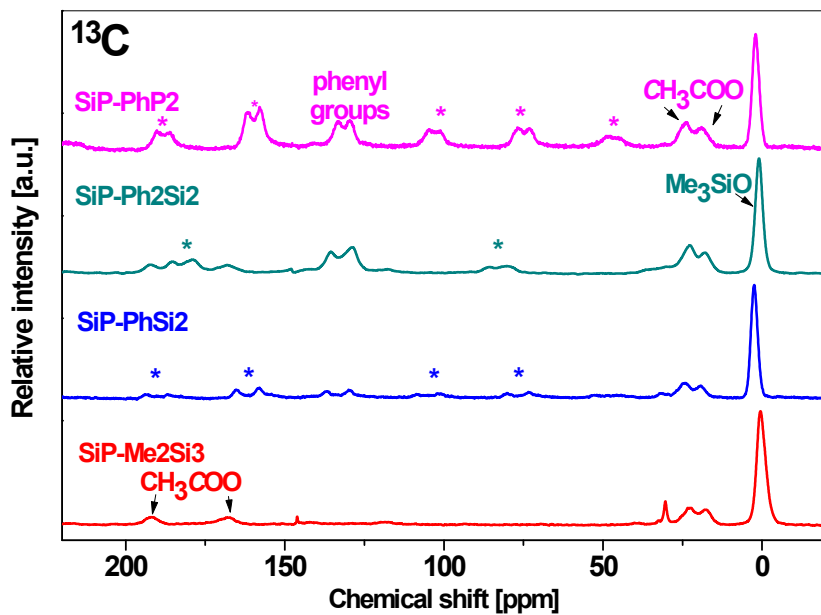

Fig. 6S:  $^{13}\text{C}$  CPMAS NMR spectra of samples with partially substituted silicon acetate with alkyl- and arylacetoxysilanes and  $\text{PhP}(\text{O})(\text{OSiMe}_3)_2$ . Asterisks denote spinning sidebands.

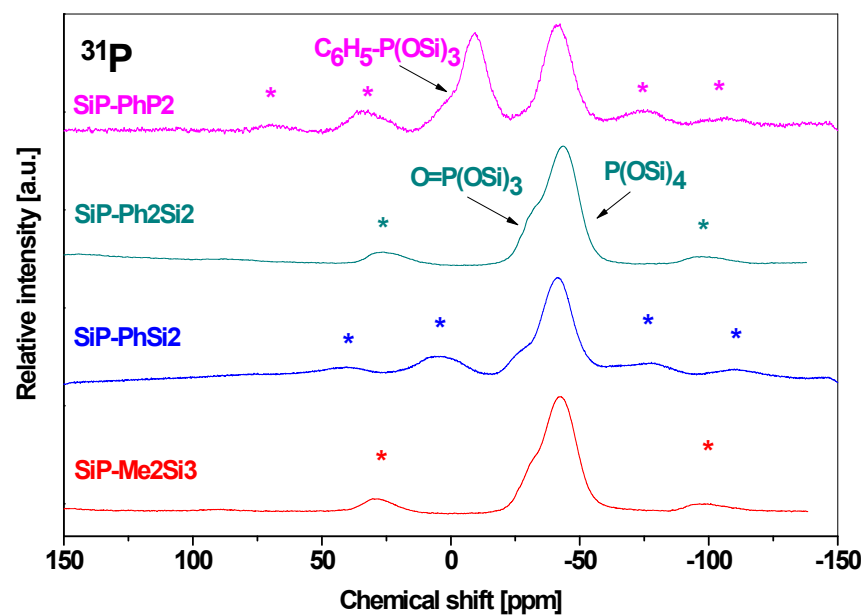

Fig. 7S:  $^{31}\text{P}$  MAS NMR spectra of samples with partially substituted silicon acetate with alkyl- and arylacetoxysilanes and  $\text{PhP}(\text{O})(\text{OSiMe}_3)_2$ . Asterisks denote spinning sidebands.

**SiP-PhP1.** OP(OSiMe<sub>3</sub>)<sub>3</sub> (0.978 g; 3.11 mmol) was added dropwise to a stirred solution of Si(OAc)<sub>4</sub> (0.670 g; 2.54 mmol) in toluene (12 cm<sup>3</sup>). After the addition of TTP was complete, PhP(O)(OSiMe<sub>3</sub>)<sub>2</sub> (0.136 g; 0.450 mmol) was added dropwise to a reaction mixture, which provided a milky gel within 3 hours. The reaction mixture was kept at 80 °C for one week and then dried *in vacuo* affording 0.671 g of a yellowish xerogel (**SiP-PhP1**).

IR (**SiP-PhP1**, KBr, cm<sup>-1</sup>)  $\nu$ : 501 m, 655 w ( $\nu$  SiC<sub>3</sub>), 694 w, 760 w ( $\rho_s$  SiCH<sub>3</sub>), 856 s ( $\rho_{as}$  SiCH<sub>3</sub>), 1021 vs ( $\rho$  CH<sub>3</sub>), 1095 vs ( $\nu$  Si–O–P), 1151 vs ( $\nu$  P–O–Si), 1261 s ( $\delta$  SiCH<sub>3</sub>), 1310 sh ( $\nu$  P=O), 1371 w ( $\delta_s$  CH<sub>3</sub>), 1443 w ( $\delta_{as}$  CH<sub>3</sub>), 1542 w ( $\nu$  CH<sub>3</sub>COO bident), 1718 w ( $\nu$  CH<sub>3</sub>COO unident), 1765 w ( $\nu$  CH<sub>3</sub>COO unident), 2903 vw ( $\nu_s$  CH<sub>3</sub>), 2964 w ( $\nu_{as}$  CH<sub>3</sub>), 3063 vw ( $\nu_{as}$  C<sub>ar</sub>H).

<sup>13</sup>C CPMAS NMR (**SiP-PhP1**, ppm)  $\delta$ : 3.1 (POSiCH<sub>3</sub>), 19.9 (CH<sub>3</sub>COO bident), 25.2 (CH<sub>3</sub>COO unident), 126–140 (C<sub>6</sub>H<sub>5</sub>).

<sup>29</sup>Si MAS NMR (**SiP-PhP1**, ppm)  $\delta$ : 23 (POSiMe<sub>3</sub>), –112 (SiO<sub>4</sub>), –194 (SiO<sub>6</sub>), –213 (SiO<sub>6</sub>).

<sup>31</sup>P MAS NMR (**SiP-PhP1**, ppm)  $\delta$ : –41 (P(OSi)<sub>4</sub>), –9 (PhP(OSi)<sub>3</sub>), 1 sh (PhP(O)(OSi)<sub>2</sub>).

**Tab. 5S:** Co-condensation of Si(OAc)<sub>4</sub> and OP(OSiMe<sub>3</sub>)<sub>3</sub> partially substituted with R<sub>n</sub>Si(OAc)<sub>4-n</sub> (n = 1,2; R= Me, Ph) and PhP(O)(OSiMe<sub>3</sub>)<sub>2</sub>,: Reagent molar amounts, yields, degrees of condensation (DC) and comparison of experimental (ML) and calculated mass losses (ML<sub>calc</sub>) during thermogravimetric analysis of xerogels with partially substituted Si(OAc)<sub>4</sub> or OP(OSiMe<sub>3</sub>)<sub>3</sub>.

| Sample     | n <sub>Si(OAc)<sub>4</sub></sub><br>[mmol] | n <sub>OP(OSiMe<sub>3</sub>)<sub>3</sub></sub><br>[mmol] | n <sup>a</sup> [mmol] | Yield<br>[g] | DC<br>[%] | ML<br>[%] | ML <sub>calc</sub><br>[%] |
|------------|--------------------------------------------|----------------------------------------------------------|-----------------------|--------------|-----------|-----------|---------------------------|
| SiP        | 11.93                                      | 15.84                                                    | -                     | 2.733        | 85.7      | 29.4      | 32.8                      |
| SiP-MeSi1  | 1.92                                       | 2.89                                                     | 0.17                  | 0.547        | 79.2      | 35.3      | 41.4                      |
| SiP-MeSi2  | 1.88                                       | 2.81                                                     | 0.27                  | 0.542        | 80.7      | 31.6      | 39.7                      |
| SiP-MeSi3  | 1.96                                       | 3.06                                                     | 0.37                  | 0.568        | 82.0      | 30.6      | 38.0                      |
| SiP-MeSi4  | 1.94                                       | 3.12                                                     | 0.53                  | 0.575        | 83.8      | 29.1      | 35.6                      |
| SiP-MeSi5  | 1.68                                       | 3.79                                                     | 1.57                  | 0.613        | 91.0      | 31.5      | 24.1                      |
| SiP-Me2Si1 | 3.57                                       | 4.88                                                     | 0.20                  | 1.064        | 74.8      | 26.6      | 46.0                      |
| SiP-Me2Si2 | 1.46                                       | 2.05                                                     | 0.17                  | 0.367        | 85.3      | 29.9      | 33.5                      |
| SiP-Me2Si3 | 1.90                                       | 2.73                                                     | 0.29                  | 0.457        | 88.2      | 36.5      | 27.1                      |
| SiP-Me2Si4 | 1.95                                       | 2.86                                                     | 0.40                  | 0.522        | 84.9      | 29.1      | 34.0                      |
| SiP-Me2Si5 | 1.74                                       | 2.63                                                     | 0.49                  | 0.317        | 87.5      | 28.6      | -                         |
| SiP-Me2Si6 | 1.80                                       | 2.80                                                     | 0.61                  | 0.539        | 83.1      | 30.2      | 36.4                      |
| SiP-PhSi1  | 1.97                                       | 3.17                                                     | 0.56                  | 0.622        | 83.7      | 34.6      | 39.2                      |
| SiP-PhSi2  | 1.99                                       | 3.88                                                     | 1.26                  | 0.854        | 81.0      | 34.9      | 44.7                      |

|            |      |      |      |       |      |      |      |
|------------|------|------|------|-------|------|------|------|
| SiP-Ph2Si1 | 2.15 | 2.94 | 0.17 | 0.598 | 81.0 | 33.6 | 41.5 |
| SiP-Ph2Si2 | 2.21 | 3.32 | 0.52 | 0.727 | 80.3 | 38.0 | 45.3 |
| SiP-PhP1   | 2.54 | 3.11 | 0.45 | 0.671 | 83.0 | 28.2 | 39.6 |
| SiP-PhP2   | 2.63 | 2.22 | 1.98 | 0.777 | 87.3 | 47.3 | 41.2 |

<sup>a</sup>Amount of added organoacetoxysilane/phosphonate component

**Tab. 6S: Textural properties of hybrid xerogels with partially substituted  $\text{Si}(\text{OAc})_4$  with  $\text{R}_n\text{Si}(\text{OAc})_{4-n}$  or  $\text{OP}(\text{OSiMe}_3)_3$  with  $\text{RP}(\text{O})(\text{OSiMe}_3)_2$**

| Sample     | Additive <sup>a</sup>                    | Amount of additive [mol%] | SA <sup>b</sup> [ $\text{m}^2 \text{g}^{-1}$ ] | V <sub>total</sub> <sup>c</sup> [ $\text{cm}^3 \text{g}^{-1}$ ] | V <sub>micro</sub> <sup>d</sup> [ $\text{cm}^3 \text{g}^{-1}$ ] | D <sup>e</sup> [nm] | MP <sup>f</sup> [%] |
|------------|------------------------------------------|---------------------------|------------------------------------------------|-----------------------------------------------------------------|-----------------------------------------------------------------|---------------------|---------------------|
| SiP        | -                                        | 0.00                      | 568                                            | 0.280                                                           | 0.188                                                           | 2.0                 | 67                  |
| SiP-MeSi1  | MeSi(OAc) <sub>3</sub>                   | 8.28                      | 529                                            | 0.375                                                           | 0.114                                                           | 2.9                 | 30                  |
| SiP-MeSi2  | MeSi(OAc) <sub>3</sub>                   | 12.58                     | 525                                            | 0.384                                                           | 0.093                                                           | 3.0                 | 24                  |
| SiP-MeSi3  | MeSi(OAc) <sub>3</sub>                   | 15.97                     | 528                                            | 0.344                                                           | 0.128                                                           | 2.6                 | 37                  |
| SiP-MeSi4  | MeSi(OAc) <sub>3</sub>                   | 21.54                     | 517                                            | 0.489                                                           | 0.004                                                           | 3.8                 | 1                   |
| SiP-MeSi5  | MeSi(OAc) <sub>3</sub>                   | 48.26                     | 313                                            | 0.550                                                           | 0.000                                                           | 4.0                 | 0                   |
| SiP-Me2Si1 | Me <sub>2</sub> Si(OAc) <sub>2</sub>     | 5.38                      | 522                                            | 0.313                                                           | 0.153                                                           | 2.4                 | 49                  |
| SiP-Me2Si2 | Me <sub>2</sub> Si(OAc) <sub>2</sub>     | 10.37                     | 382                                            | 0.217                                                           | 0.117                                                           | 2.3                 | 54                  |
| SiP-Me2Si3 | Me <sub>2</sub> Si(OAc) <sub>2</sub>     | 13.19                     | 357                                            | 0.211                                                           | 0.105                                                           | 2.5                 | 50                  |
| SiP-Me2Si4 | Me <sub>2</sub> Si(OAc) <sub>2</sub>     | 16.86                     | 380                                            | 0.244                                                           | 0.123                                                           | 2.5                 | 50                  |
| SiP-Me2Si5 | Me <sub>2</sub> Si(OAc) <sub>2</sub>     | 21.96                     | 389                                            | 0.233                                                           | 0.113                                                           | 2.4                 | 48                  |
| SiP-Me2Si6 | Me <sub>2</sub> Si(OAc) <sub>2</sub>     | 25.22                     | 547                                            | 0.274                                                           | 0.175                                                           | 2.0                 | 64                  |
| SiP-PhSi1  | PhSi(OAc) <sub>3</sub>                   | 22.22                     | 558                                            | 0.550                                                           | 0.000                                                           | 4.0                 | 0                   |
| SiP-PhSi2  | PhSi(OAc) <sub>3</sub>                   | 38.81                     | 251                                            | 0.188                                                           | 0.047                                                           | 3.0                 | 25                  |
| SiP-Ph2Si1 | Ph <sub>2</sub> Si(OAc) <sub>2</sub>     | 7.32                      | 392                                            | 0.357                                                           | 0.005                                                           | 3.7                 | 1                   |
| SiP-Ph2Si2 | Ph <sub>2</sub> Si(OAc) <sub>2</sub>     | 19.05                     | 101                                            | 0.102                                                           | 0.000                                                           | 4.7                 | 0                   |
| SiP-PhP1   | PhP(O)(OSiMe <sub>3</sub> ) <sub>2</sub> | 12.63                     | 436                                            | 0.209                                                           | 0.140                                                           | 2.0                 | 67                  |
| SiP-PhP2   | PhP(O)(OSiMe <sub>3</sub> ) <sub>2</sub> | 47.10                     | 424                                            | 0.232                                                           | 0.136                                                           | 2.2                 | 59                  |

<sup>a</sup> Added  $\text{R}_n\text{Si}(\text{OAc})_{4-n}$  ( $n = 1, 2$ ; R = Me, Ph) or  $\text{PhP}(\text{O})(\text{OSiMe}_3)_2$  components, <sup>b</sup> Surface area, <sup>c</sup> Total pore volume at  $p/p_0 = 0.97$ , <sup>d</sup> Micropore volume by t-plot, <sup>e</sup> Average pore diameter ( $4V_{\text{total}}/\text{SA}$ ), <sup>f</sup> Ratio of micropore volume to total pore volume

11/07/2014

Quantachrome Instruments  
Quantachrome Autosorb Automated Gas Sorption System Report  
Autosorb 1 for Windows 1.54

|                  |                                                                   |                 |               |                |                  |
|------------------|-------------------------------------------------------------------|-----------------|---------------|----------------|------------------|
| File name:       | H:\labdenik Skoskalik_05_11_2014\BET ASTysk\S10PG47\S1P-MeSi1.raw |                 |               |                |                  |
| Sample ID:       | S10PG47                                                           | Description:    | S10PG47       |                |                  |
| Comments:        |                                                                   |                 |               |                |                  |
| Operator:        | hugo                                                              | Sample weight:  | 0.0285 g      |                |                  |
| Analysis gas:    | Nitrogen                                                          | X sect. area:   | 16.2 f./molec | Non-ideality:  | 6.58e-05         |
| Adsorbate (DRP): | Nitrogen                                                          | Bath Temp.:     | 298.00        | Analysis Time: | 535.1 min        |
| Outgas Temp:     | 25.0 °C                                                           | Outgas Time:    | 20.0 hrs      | End of run:    | 04/17/2012 20:52 |
| P/Po tolerance:  | 0                                                                 | Equil. time:    | 3             | TempComp:      | Off              |
| Station #:       | 1                                                                 | PC sw. version: | 1.54          |                |                  |

A ● D ■

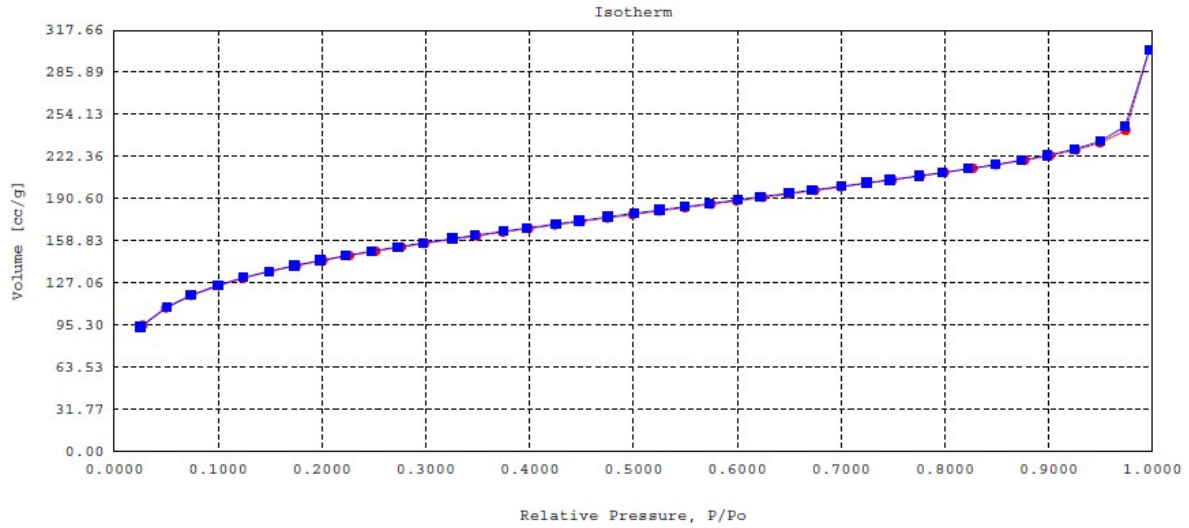

Fig. 8S: Adsorption-desorption isotherm of sample S1P-MeSi1.

11/07/2014

Quantachrome Instruments  
Quantachrome Autosorb Automated Gas Sorption System Report  
Autosorb 1 for Windows 1.54

|                  |                                                                   |                 |               |                |                  |
|------------------|-------------------------------------------------------------------|-----------------|---------------|----------------|------------------|
| File name:       | H:\labdenik Skoskalik_05_11_2014\BET ASTysk\S10PG53\S1P-MeSi5.raw |                 |               |                |                  |
| Sample ID:       | S10PG53                                                           | Description:    | S10PG53       |                |                  |
| Comments:        |                                                                   |                 |               |                |                  |
| Operator:        | hugo                                                              | Sample weight:  | 0.057 g       |                |                  |
| Analysis gas:    | Nitrogen                                                          | X sect. area:   | 16.2 f./molec | Non-ideality:  | 6.58e-05         |
| Adsorbate (DRP): | Nitrogen                                                          | Bath Temp.:     | 298.00        | Analysis Time: | 640.0 min        |
| Outgas Temp:     | 25.0 °C                                                           | Outgas Time:    | 7.0 hrs       | End of run:    | 05/23/2012 06:27 |
| P/Po tolerance:  | 0                                                                 | Equil. time:    | 3             | TempComp:      | Off              |
| Station #:       | 1                                                                 | PC sw. version: | 1.54          |                |                  |

A ● D ■

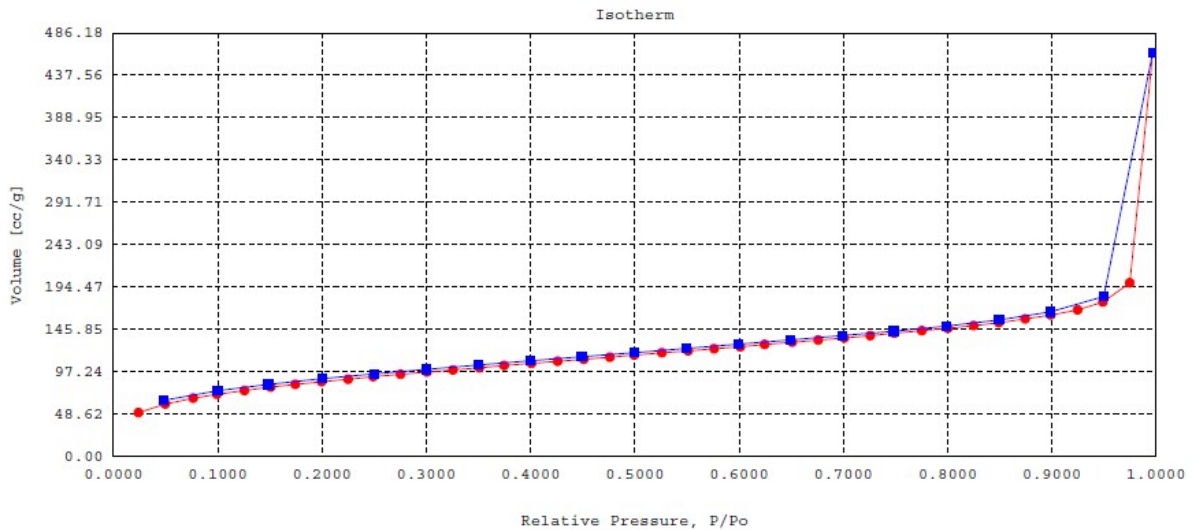

Fig. 9S: Adsorption-desorption isotherm of sample S1P-MeSi5.

11/07/2014

Quantachrome Instruments  
Quantachrome Autosorb Automated Gas Sorption System Report  
Autosorb 1 for Windows 1.54

|                  |                                                                    |                 |                            |                |                  |
|------------------|--------------------------------------------------------------------|-----------------|----------------------------|----------------|------------------|
| File name:       | H:\labdenik škoskalík_05_11_2014\BET ASTysk\S10PG29\S1P-Me2Si1.raw |                 |                            |                |                  |
| Sample ID:       | S10PG29                                                            | Description:    | S10PG29                    |                |                  |
| Comments:        |                                                                    |                 |                            |                |                  |
| Operator:        | hugo                                                               | Sample weight:  | 0.032 g                    |                |                  |
| Analysis gas:    | Nitrogen                                                           | X sect. area:   | 16.2 L <sup>2</sup> /molec | Non-ideality:  | 6.58e-05         |
| Adsorbate (DRP): | Nitrogen                                                           | Bath Temp.:     | 77.40                      |                |                  |
| Outgas Temp:     | 25.0 °C                                                            | Outgas Time:    | 8.5 hrs                    | Analysis Time: | 516.8 min        |
| P/Po tolerance:  | 0                                                                  | Equil. time:    | 3                          | End of run:    | 12/13/2011 06:19 |
| Station #:       | 1                                                                  | PC sw. version: | 1.54                       | TempComp:      | Off              |

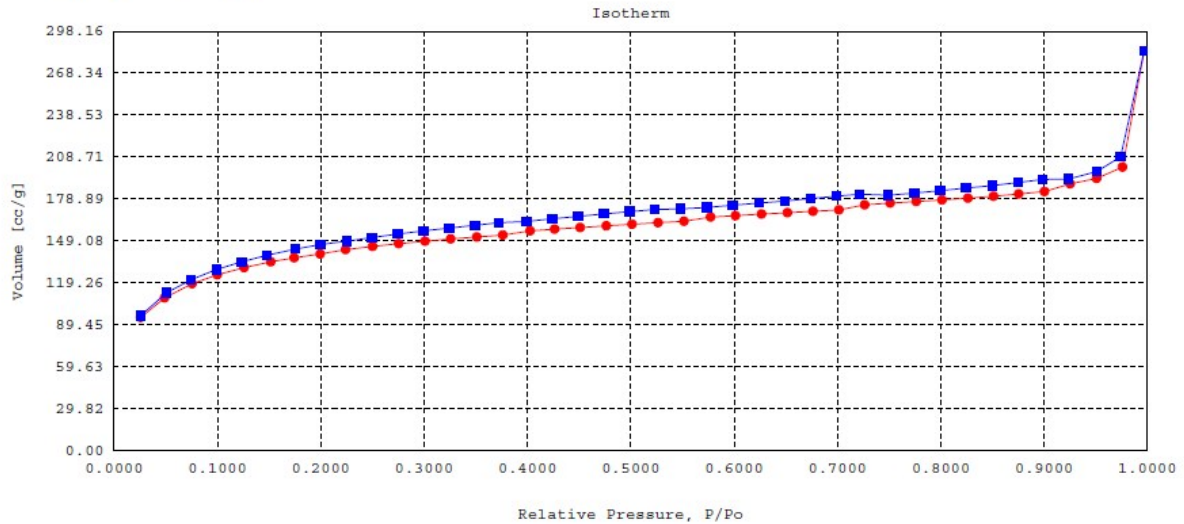

Fig. 10S: Adsorption-desorption isotherm of sample S1P-Me2Si1.

11/07/2014

Quantachrome Instruments  
Quantachrome Autosorb Automated Gas Sorption System Report  
Autosorb 1 for Windows 1.54

|                  |                                                                    |                 |                            |                |                  |
|------------------|--------------------------------------------------------------------|-----------------|----------------------------|----------------|------------------|
| File name:       | H:\labdenik škoskalík_05_11_2014\BET ASTysk\S10PG40\S1P-Me2Si5.raw |                 |                            |                |                  |
| Sample ID:       | S10PG40                                                            | Description:    | S10PG40                    |                |                  |
| Comments:        |                                                                    |                 |                            |                |                  |
| Operator:        | hugo                                                               | Sample weight:  | 0.0484 g                   |                |                  |
| Analysis gas:    | Nitrogen                                                           | X sect. area:   | 16.2 L <sup>2</sup> /molec | Non-ideality:  | 6.58e-05         |
| Adsorbate (DRP): | Nitrogen                                                           | Bath Temp.:     | 77.30                      |                |                  |
| Outgas Temp:     | 25.0 °C                                                            | Outgas Time:    | 4.8 hrs                    | Analysis Time: | 448.0 min        |
| P/Po tolerance:  | 0                                                                  | Equil. time:    | 3                          | End of run:    | 03/15/2012 02:56 |
| Station #:       | 1                                                                  | PC sw. version: | 1.54                       | TempComp:      | Off              |

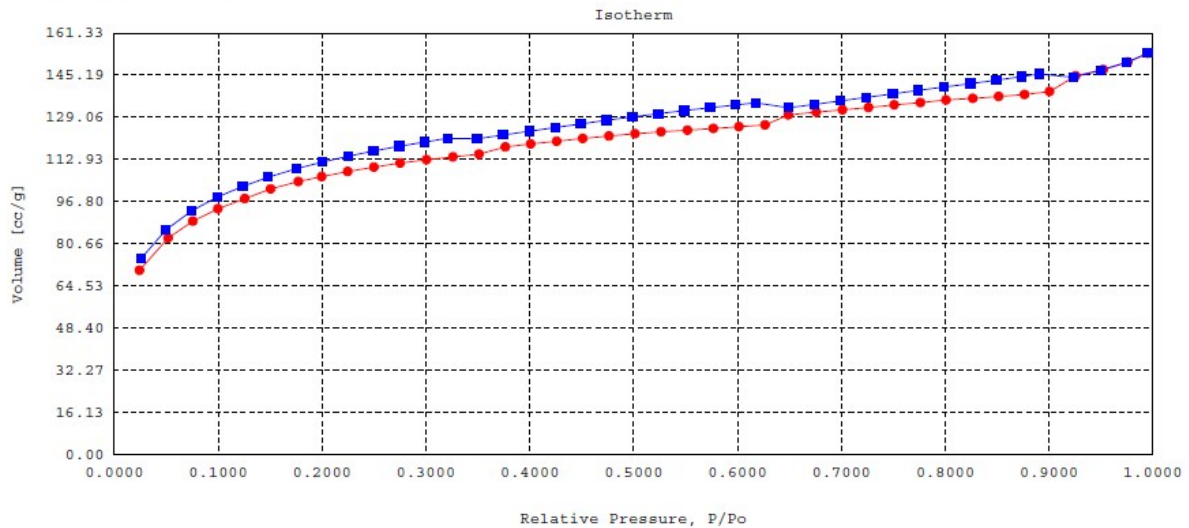

Fig. 11S: Adsorption-desorption isotherm of sample S1P-Me2Si5.

11/07/2014

Quantachrome Instruments  
Quantachrome Autosorb Automated Gas Sorption System Report  
Autosorb 1 for Windows 1.54

|                  |                                                                   |                 |              |                |                  |
|------------------|-------------------------------------------------------------------|-----------------|--------------|----------------|------------------|
| File name:       | H:\labdenik skoskalik_05_11_2014\BET ASTysk\S1OPG55\S1P-PhSi1.raw |                 |              |                |                  |
| Sample ID:       | S1OPG55                                                           | Description:    | S1OPG55      |                |                  |
| Comments:        |                                                                   |                 |              |                |                  |
| Operator:        | hugo                                                              | Sample weight:  | 0.0194 g     | Non-ideality:  | 6.58e-05         |
| Analysis gas:    | Nitrogen                                                          | X sect. area:   | 16.2 L/molec |                |                  |
| Adsorbate (DRP): | Nitrogen                                                          | Bath Temp.:     | 298.00       |                |                  |
| Outgas Temp:     | 25.0 °C                                                           | Outgas Time:    | 14.0 hrs     | Analysis Time: | 604.0 min        |
| P/Po tolerance:  | 0                                                                 | Equil. time:    | 3            | End of run:    | 05/24/2012 22:17 |
| Station #:       | 1                                                                 | PC sw. version: | 1.54         | TempComp:      | Off              |

A ● D ■

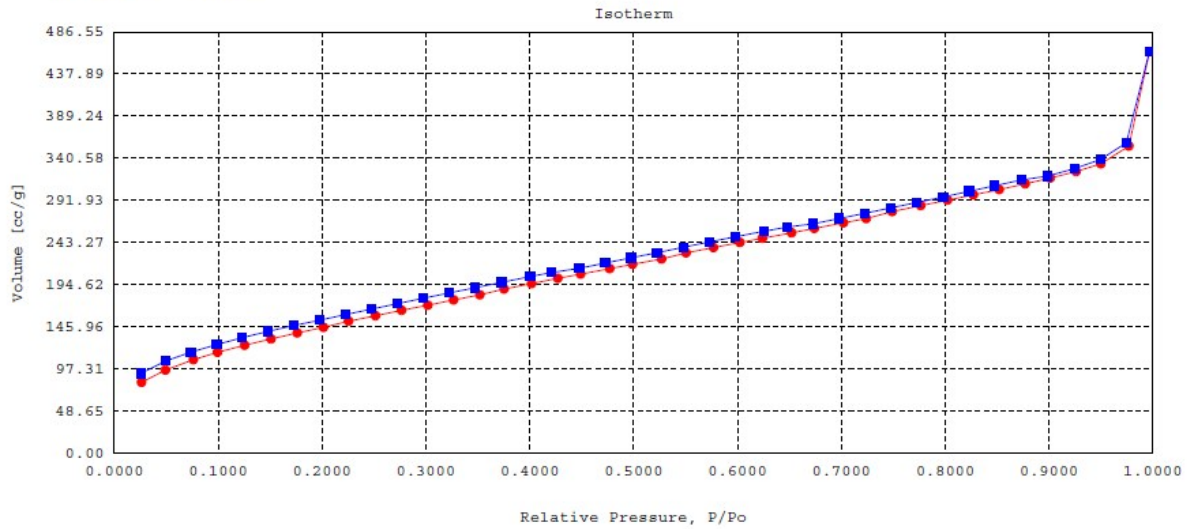

Fig. 12S: Adsorption-desorption isotherm of sample S1P-PhSi1.

11/07/2014

Quantachrome Instruments  
Quantachrome Autosorb Automated Gas Sorption System Report  
Autosorb 1 for Windows 1.54

|                  |                                                                    |                 |              |                |                  |
|------------------|--------------------------------------------------------------------|-----------------|--------------|----------------|------------------|
| File name:       | H:\labdenik skoskalik_05_11_2014\BET ASTysk\S1OPG43\S1P-Ph2Si1.raw |                 |              |                |                  |
| Sample ID:       | S1OPG43                                                            | Description:    | S1OPG43      |                |                  |
| Comments:        |                                                                    |                 |              |                |                  |
| Operator:        | hugo                                                               | Sample weight:  | 0.0148 g     | Non-ideality:  | 6.58e-05         |
| Analysis gas:    | Nitrogen                                                           | X sect. area:   | 16.2 L/molec |                |                  |
| Adsorbate (DRP): | Nitrogen                                                           | Bath Temp.:     | 298.00       |                |                  |
| Outgas Temp:     | 25.0 °C                                                            | Outgas Time:    | 8.0 hrs      | Analysis Time: | 500.6 min        |
| P/Po tolerance:  | 0                                                                  | Equil. time:    | 3            | End of run:    | 04/13/2012 03:36 |
| Station #:       | 1                                                                  | PC sw. version: | 1.54         | TempComp:      | Off              |

A ● D ■

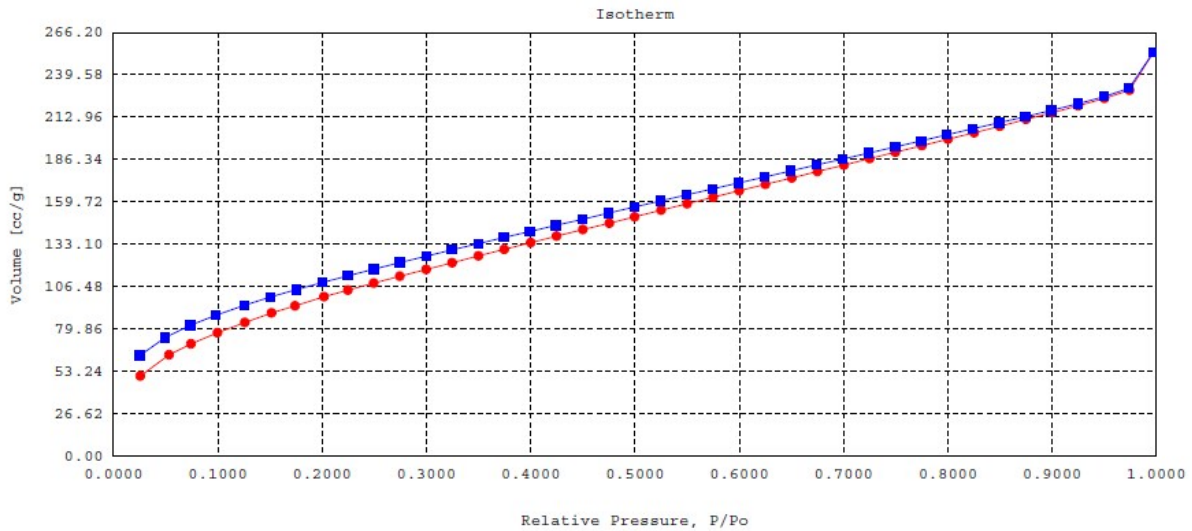

Fig. 13S: Adsorption-desorption isotherm of sample S1P-Ph2Si1.



11/07/2014

Quantachrome Instruments  
Quantachrome Autosorb Automated Gas Sorption System Report  
Autosorb 1 for Windows 1.54

|                  |                                                                 |                 |              |                |                  |
|------------------|-----------------------------------------------------------------|-----------------|--------------|----------------|------------------|
| File name:       | H:\labdenik skoskalik_05_11_2014\BET ASTysk\S1OPG90\S1P-Ph1.raw |                 |              |                |                  |
| Sample ID:       | S1OPG90                                                         | Description:    | S1OPG90      |                |                  |
| Comments:        |                                                                 |                 |              |                |                  |
| Operator:        | hugo                                                            | Sample weight:  | 0.062 g      |                |                  |
| Analysis gas:    | Nitrogen                                                        | X sect. area:   | 16.2 L/molec | Non-ideality:  | 6.58e-05         |
| Adsorbate (DRP): | Nitrogen                                                        | Bath Temp.:     | 77.40        |                |                  |
| Outgas Temp:     | 25.0 °C                                                         | Outgas Time:    | 23.0 hrs     | Analysis Time: | 560.5 min        |
| P/Po tolerance:  | 0                                                               | Equil. time:    | 3            | End of run:    | 03/13/2013 20:13 |
| Station #:       | 1                                                               | PC sw. version: | 1.54         | TempComp:      | Off              |

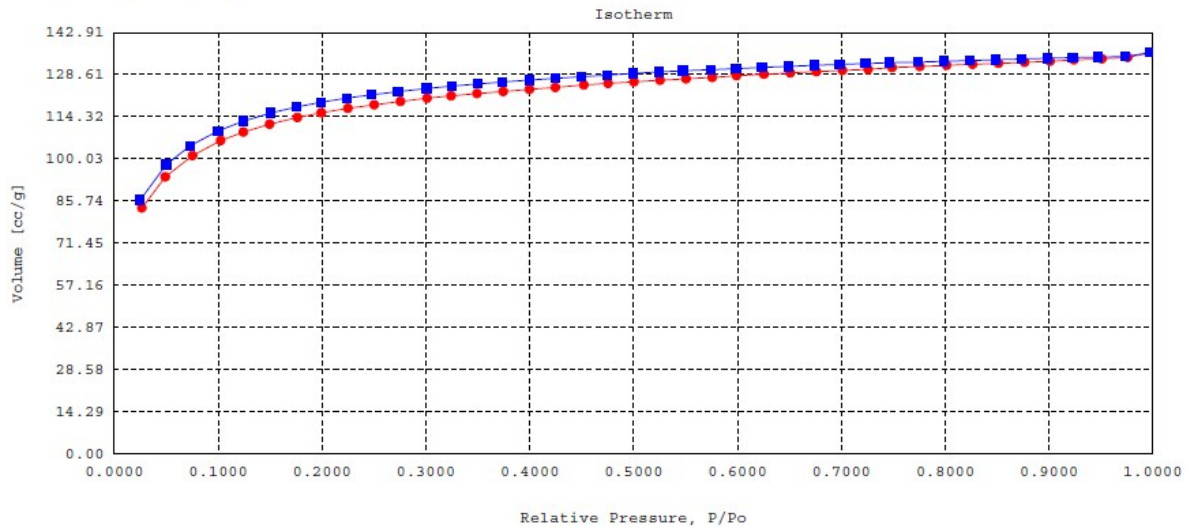

Fig. 14S: Adsorption-desorption isotherm of sample SiP-Ph1.

### 3. Bridged acetoxysilanes and phosphonic acid esters

As an example, syntheses and characterizations of the **SiC2SiP** sample with a CH<sub>2</sub>CH<sub>2</sub> spacer between silicon atoms and the **SiPC6P** sample with C<sub>6</sub>H<sub>4</sub> between phosphorus centers are described below.

Pertinent data for other samples are listed in Tab. 5S.

**SiC2SiP.** OP(OSiMe<sub>3</sub>)<sub>3</sub> (0.704 g; 2.24 mmol) was added dropwise to a stirred solution of (AcO)<sub>3</sub>SiCH<sub>2</sub>CH<sub>2</sub>Si(OAc)<sub>3</sub> (0.471 g; 1.07 mmol) in toluene (10 cm<sup>3</sup>). After the addition was complete, stirring was stopped and the reaction mixture was kept at 80 °C for one week. The reaction mixture provided a milky rigid gel overnight. The reaction was stopped after one week and dried *in vacuo* affording 0.387 g of a white xerogel (**SiC2SiP**).

IR (**SiC2SiP**, KBr, cm<sup>-1</sup>)  $\nu$  :  $\nu$  490 m, 608 vw, 639 vw ( $\nu$  SiC<sub>3</sub>), 763 m ( $\rho_s$  SiCH<sub>3</sub>), 790 sh, 851 m ( $\rho_{as}$  SiCH<sub>3</sub>), 1018 vs ( $\nu$  Si–O–P), 1175 m, 1231 w, 1259 m ( $\delta_s$  SiCH<sub>3</sub>), 1313 s ( $\nu$  P=O), 1374 vw ( $\delta_s$  CH<sub>3</sub>), 1406 vw, 1601 vw, 1754 m ( $\nu_{as}$  CH<sub>3</sub>COO unident), 2906 vw ( $\nu_s$  CH<sub>3</sub>), 2963 w ( $\nu_{as}$  CH<sub>3</sub>).

<sup>13</sup>C CPMAS NMR (**SiC2SiP**, ppm)  $\delta$  : 1.2 (POSiCH<sub>3</sub>), 3.7 shoulder (SiCH<sub>2</sub>CH<sub>2</sub>Si), 22.3 (CH<sub>3</sub>COO unident), 170.6 (CH<sub>3</sub>COO unident).

<sup>29</sup>Si MAS NMR (**SiC2SiP**, ppm)  $\delta$  : 26 (POSiMe<sub>3</sub>), –65 (O<sub>3</sub>SiCH<sub>2</sub>CH<sub>2</sub>SiO<sub>3</sub>).

<sup>31</sup>P MAS NMR (**SiC2SiP**, ppm)  $\delta$  : –37 (O=P(OSi)<sub>3</sub>).

**SiPC6P.** A solution of  $(\text{Me}_3\text{SiO})_2\text{P}(\text{O})\text{C}_6\text{H}_4\text{P}(\text{O})(\text{OSiMe}_3)_2$  (2.008 g; 3.812 mmol) in toluene (5 cm<sup>3</sup>) was added dropwise to a stirred solution of  $\text{Si}(\text{OAc})_4$  (1.005 g; 3.803 mmol) in toluene (12 cm<sup>3</sup>). After the addition was complete, stirring was stopped and the reaction mixture was kept at 80 °C for one week. The reaction mixture provided a milky rigid gel overnight. The reaction was stopped after one week and dried *in vacuo* affording 1.471 g of a white xerogel (**SiPC6P**).

IR (**SiPC6P**, KBr, cm<sup>-1</sup>)  $\nu$  : 437 w, 534 m, 608 m, 765 w ( $\rho_s$  SiCH<sub>3</sub>), 855 s ( $\rho_{as}$  SiCH<sub>3</sub>), 1019 vs ( $\rho$  CH<sub>3</sub>), 1082 vs ( $\nu$  Si–O–P), 1154 vs ( $\nu$  P–O–Si), 1261 s ( $\delta_s$  SiCH<sub>3</sub>), 1286 sh ( $\nu$  P=O), 1374 w ( $\delta_s$  CH<sub>3</sub>), 1419, 1542 w ( $\nu_s$  CH<sub>3</sub>COO bident), 1716 ( $\nu_{as}$  CH<sub>3</sub>COO unident) 1765 ( $\nu_{as}$  CH<sub>3</sub>COO unident), 2906 vw ( $\nu_s$  CH<sub>3</sub>), 2964 w ( $\nu_{as}$  CH<sub>3</sub>), 3030 vw ( $\nu$  C<sub>ar</sub>-H).

<sup>13</sup>C CP MAS NMR (**SiPC6P**, ppm)  $\delta$  : 3.1 (POSiCH<sub>3</sub>), 19.9 (CH<sub>3</sub>COO bident), 24.6 (CH<sub>3</sub>COO unident), 133.9 (C<sub>6</sub>H<sub>4</sub>).

<sup>29</sup>Si MAS NMR (**SiPC6P**, ppm)  $\delta$  : 25 (POSiMe<sub>3</sub>), -108 (SiO<sub>4</sub>), -195 (SiO<sub>6</sub>), -214 (SiO<sub>6</sub>).

<sup>31</sup>P MAS NMR (**SiPC6P**, ppm)  $\delta$  : -11 (-C<sub>6</sub>H<sub>4</sub>P(OSi)<sub>3</sub>), -1 sh (-C<sub>6</sub>H<sub>4</sub>P(O)(OSi)<sub>2</sub>).

**Tab. 7S: Bridged acetoxysilanes and phosphonic acid esters: Reagent molar amounts, yields, degrees of condensation (DC) and comparison of experimental (ML) and calculated mass losses (ML<sub>calc</sub>) during thermogravimetric analysis of xerogels with bridging organic groups.**

| Sample  | n <sub>Si</sub><br>[mmol] | n <sub>P</sub><br>[mmol] | Yield<br>[g] | DC<br>[%] | ML<br>[%] | ML <sub>calc</sub><br>[%] |
|---------|---------------------------|--------------------------|--------------|-----------|-----------|---------------------------|
| SiC1SiP | 1.76                      | 3.52                     | 0.654        | 85.6      | 27.2      | 29.3                      |
| SiC2SiP | 1.07                      | 2.24                     | 0.387        | 78.1      | 35.3      | 27.4                      |
| SiC3SiP | 2.18                      | 4.38                     | 0.831        | 88.5      | 36.8      | 31.3                      |
| SiC6SiP | 1.02                      | 2.03                     | 0.381        | -         | 45.9      | -                         |
| SiPC2P  | 2.44                      | 2.45                     | 0.738        | 83.6      | 31.9      | 32.9                      |
| SiPC6P  | 3.80                      | 3.81                     | 1.471        | 77.0      | 33.9      | 47.7                      |

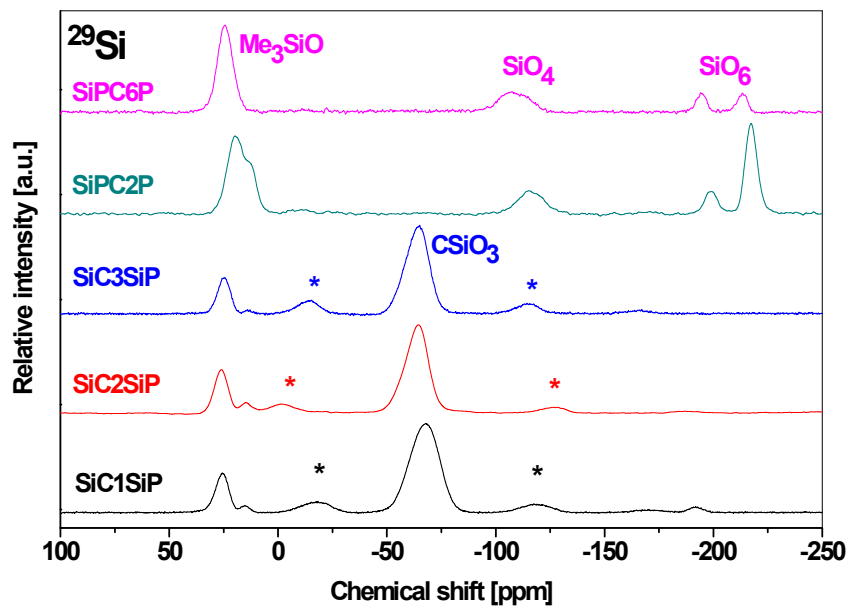

Fig. 15S:  $^{29}\text{Si}$  CPMAS NMR spectra of samples synthesized with bridged acetoxysilanes and phosphonic acid esters. Asterisks denote spinning sidebands.

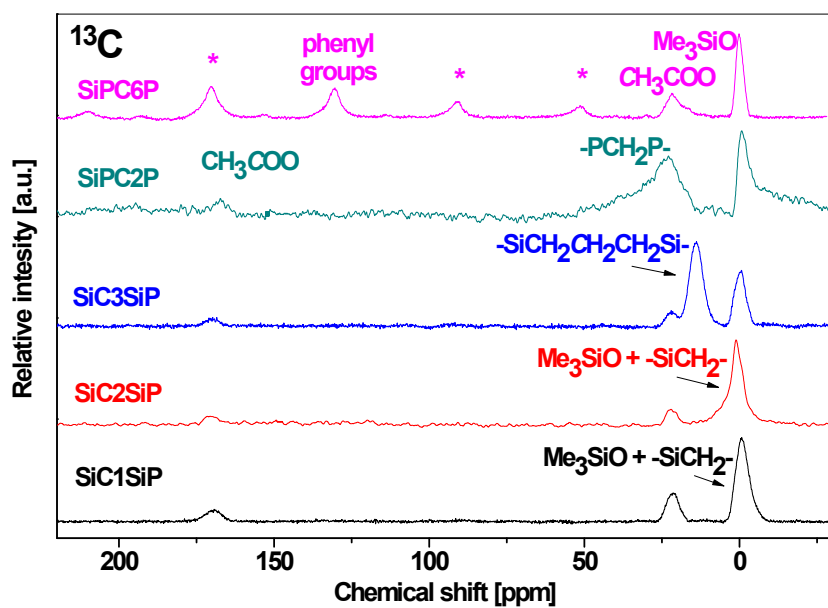

Fig. 16S:  $^{13}\text{C}$  CPMAS NMR spectra of samples synthesized with bridged acetoxysilanes and phosphonic acid esters. Asterisks denote spinning sidebands.

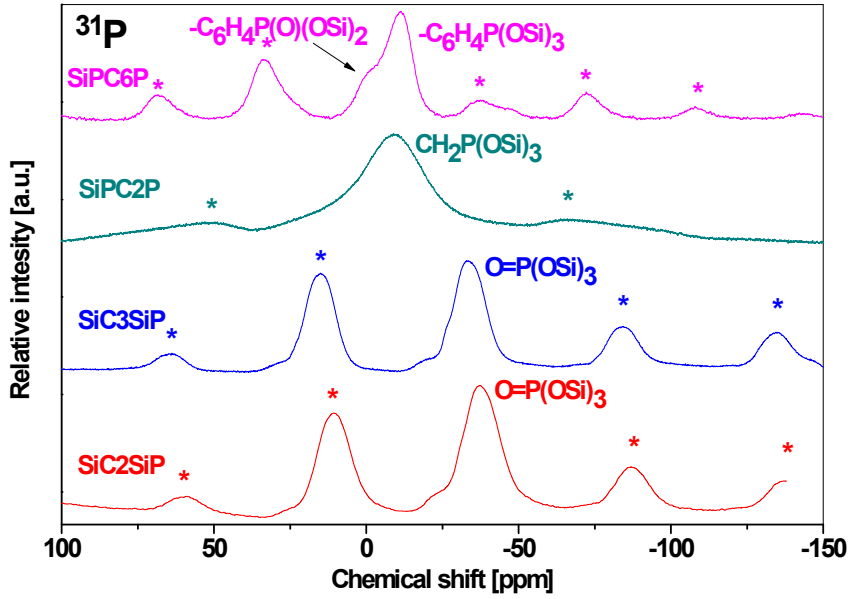

Fig. 17S:  $^{31}\text{P}$  MAS NMR spectra of samples synthesized with bridged acetoxysilanes and phosphonic acid esters. Asterisks denote spinning sidebands.

11/07/2014

Quantachrome Instruments  
Quantachrome Autosorb Automated Gas Sorption System Report  
Autosorb 1 for Windows 1.54

|                  |                                                                 |                 |                  |
|------------------|-----------------------------------------------------------------|-----------------|------------------|
| File name:       | H:\labdenik Skoskalik_05_11_2014\BET ASTysk\S10PG81\S1C3S1P.raw |                 |                  |
| Sample ID:       | S10PG81                                                         | Description:    | S10PG81          |
| Comments:        |                                                                 |                 |                  |
| Operator:        | hugo                                                            | Sample weight:  | 0.0477 g         |
| Analysis gas:    | Nitrogen                                                        | X sect. area:   | 16.2 L/molec     |
| Adsorbate (DRP): | Nitrogen                                                        | Bath Temp.:     | 77.40            |
| Outgas Temp:     | 25.0 °C                                                         | Outgas Time:    | 21.0 hrs         |
| P/Po tolerance:  | 0                                                               | Equil. time:    | 3                |
| Station #:       | 1                                                               | PC sw. version: | 1.54             |
|                  | A ● D ■                                                         | Non-ideality:   | 6.58e-05         |
|                  |                                                                 | Analysis Time:  | 898.3 min        |
|                  |                                                                 | End of run:     | 12/11/2012 09:59 |
|                  |                                                                 | TempComp:       | Off              |

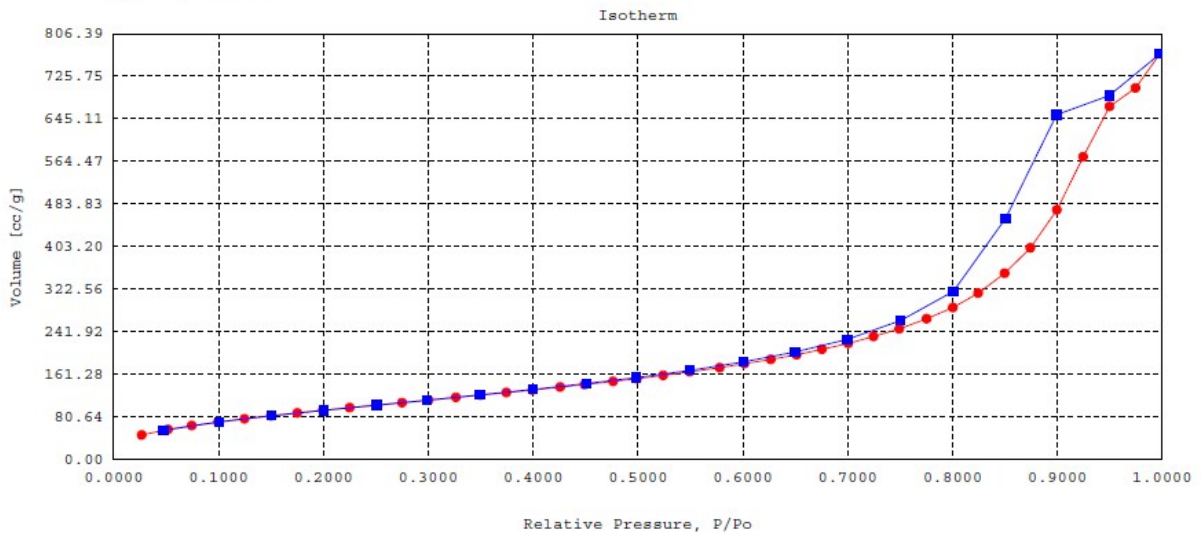

Fig. 18S: Adsorption-desorption isotherm of sample SiC3SiP.

11/07/2014

Quantachrome Instruments  
Quantachrome Autosorb Automated Gas Sorption System Report  
Autosorb 1 for Windows 1.54

|                  |                                                                 |                 |               |                |                  |
|------------------|-----------------------------------------------------------------|-----------------|---------------|----------------|------------------|
| File name:       | H:\labdenik skoskalik_05_11_2014\BET ASTysk\S10PG62\S1C6S1P.raw |                 |               |                |                  |
| Sample ID:       | S10PG62                                                         | Description:    | S10PG62       |                |                  |
| Comments:        |                                                                 |                 |               |                |                  |
| Operator:        | hugo                                                            | Sample weight:  | 0.0193 g      |                |                  |
| Analysis gas:    | Nitrogen                                                        | X sect. area:   | 16.2 l./molec | Non-ideality:  | 6.58e-05         |
| Adsorbate (DRP): | Nitrogen                                                        | Bath Temp.:     | 298.00        |                |                  |
| Outgas Temp:     | 25.0 °C                                                         | Outgas Time:    | 9.3 hrs       | Analysis Time: | 1050.9 min       |
| P/Po tolerance:  | 0                                                               | Equil. time:    | 3             | End of run:    | 06/06/2012 01:11 |
| Station #:       | 1                                                               | PC sw. version: | 1.54          | TempComp:      | Off              |

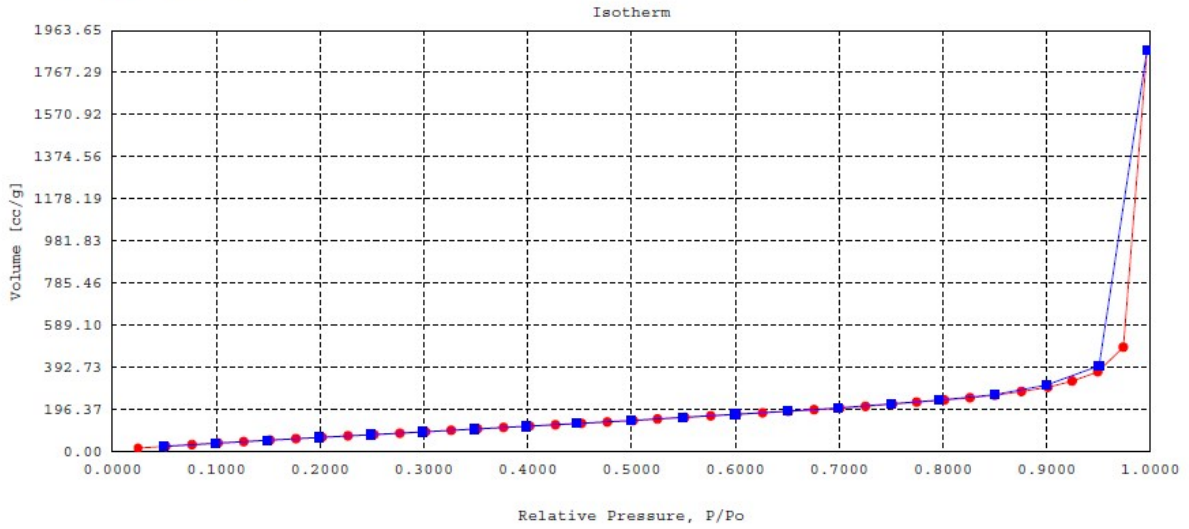

Fig. 19S: Adsorption-desorption isotherm of sample SiC6SiP.

11/07/2014

Quantachrome Instruments  
Quantachrome Autosorb Automated Gas Sorption System Report  
Autosorb 1 for Windows 1.54

|                  |                                                                |                 |               |                |                  |
|------------------|----------------------------------------------------------------|-----------------|---------------|----------------|------------------|
| File name:       | H:\labdenik skoskalik_05_11_2014\BET ASTysk\S10PG86\S1PC2P.raw |                 |               |                |                  |
| Sample ID:       | S10PG86                                                        | Description:    | S10PG86       |                |                  |
| Comments:        |                                                                |                 |               |                |                  |
| Operator:        | hugo                                                           | Sample weight:  | 0.048 g       |                |                  |
| Analysis gas:    | Nitrogen                                                       | X sect. area:   | 16.2 l./molec | Non-ideality:  | 6.58e-05         |
| Adsorbate (DRP): | Nitrogen                                                       | Bath Temp.:     | 77.40         |                |                  |
| Outgas Temp:     | 25.0 °C                                                        | Outgas Time:    | 25.0 hrs      | Analysis Time: | 592.9 min        |
| P/Po tolerance:  | 0                                                              | Equil. time:    | 3             | End of run:    | 03/02/2013 22:45 |
| Station #:       | 1                                                              | PC sw. version: | 1.54          | TempComp:      | Off              |

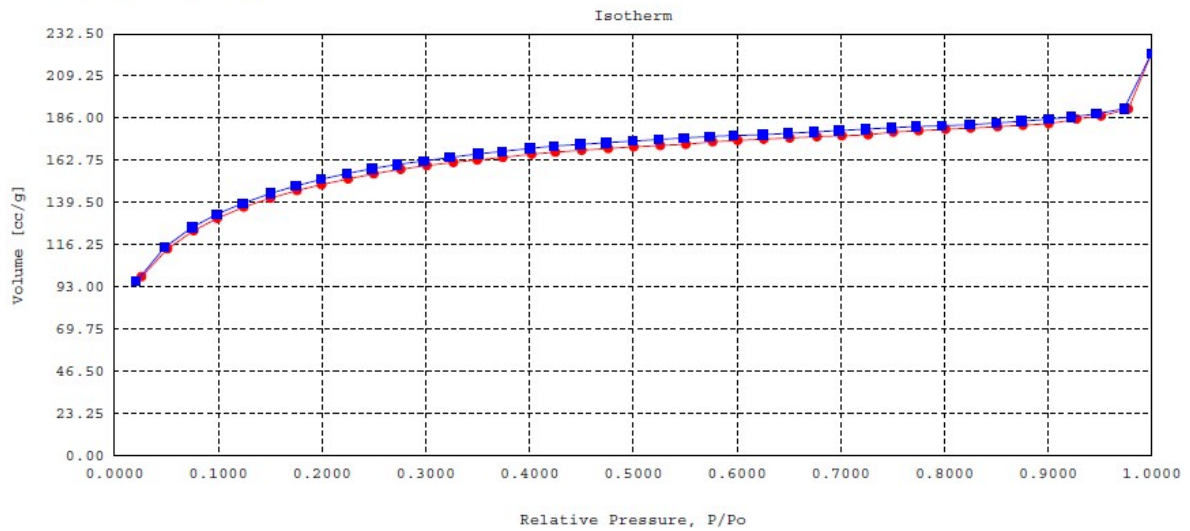

Fig. 20S: Adsorption-desorption isotherm of sample SiPC2P.

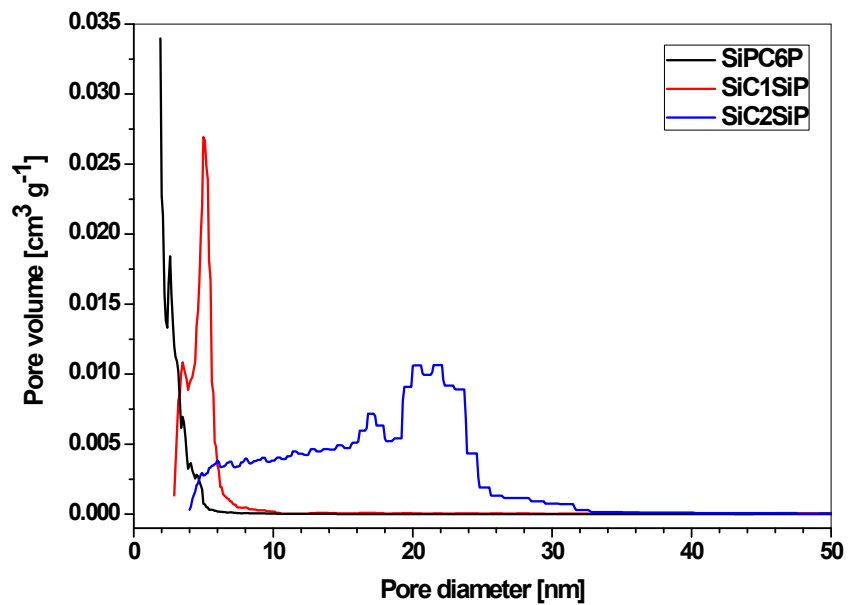

Fig. 21S: Pore size distributions of xerogels with bridging organic spacers (DFT Kernel Used :  $\text{N}_2$  at 77 K on silica, cylindrical pore, NSDFT equilibrium model).

## References

- 1 J. H. Balthis, E. G. Rochow and D. G. White, in *Inorganic Syntheses*, ed. J. C. B. Jr, John Wiley & Sons, Inc., 2007, pp. 45–47.
- 2 H. A. Schuyten, J. W. Weaver and J. D. Reid, *J. Am. Chem. Soc.*, 1947, **69**, 2110–2112.
- 3 Y. Nakaido and T. Takiguchi, *J. Org. Chem.*, 1961, **26**, 4144–4145.
- 4 Dolgov, B. N., Davydova, V. P. and Voronkov, M. G., *ZHURNAL OBSHCHEI KHIMII*, 1957, **27**, 921–926.
- 5 M. Sekine, K. Okimoto, K. Yamada and T. Hata, *J. Org. Chem.*, 1981, **46**, 2097–2107.
- 6 Z. Wang, J. M. Heising and A. Clearfield, *J. Am. Chem. Soc.*, 2003, **125**, 10375–10383.
- 7 S. Freeman, W. J. Irwin and C. H. Schwalbe, *J. Chem. Soc. Perkin Trans. 2*, 1991, 263–267.
- 8 J. Rouquerol, F. Rouquerol and K. S. W. Sing, *Adsorption by Powders and Porous Solids*, Academic Press, 1998.
- 9 S. Lowell, *Characterization of Porous Solids and Powders: Surface Area, Pore Size and Density*, Springer, 2004.
- 10 J. W. Yao, J. C. Cole, E. Pidcock, F. H. Allen, J. A. K. Howard and W. D. S. Motherwell, *Acta Crystallogr. B*, 2002, **58**, 640–646.
- 11 G. M. Sheldrick, *Acta Crystallogr. A*, 2007, **64**, 112–122.
- 12 Y. Vaugeois, R. D. Jaeger, J. Levalois-Mitjaville, A. Mazzah, M. Wörle and H. Grützmacher, *New J. Chem.*, 1998, **22**, 783–785.
